# Supplementary material for: Intronic Cis-Regulatory Modules Mediate Tissue-Specific and Microbial Control of angptl4/fiaf Transcription
Source: PLOS journal article supplement (doi:10.1371/journal.pgen.1002585), 2012-03-29
Supplement: S6 (10.1371/journal.pgen.1002585.s006) [file journal.pgen.1002585.s006]

```

Dr      1 CCTTGTAGGCTGTTGG.....AAATACAAAAAT.....GC...GTGTA.GTAT.....
Dn      1 CCTTGTAGGCTGTAGC.....AAATACAAAAAT.....GT...GTGTA.GTAT.....
Dalb    1 CCTTGTAGGCTGTAGC.....AAATACAAAAAT.....GC...ATGTA.GTAT.....
Dc      1 CCTTGTAGGCTGTAGCATCTGGGA.....AATATACAAACAT.....GTAAAGTGTAT.GTAT.....
Df      1 CCTTGTAGGCTGTAGCATCTGGGA.....ACGTACAAAAAT.....GT...GTGTA.GTAT.....
Daeq    1 CCTTGTAGTCTGTAGCATCTGGG.....AAATACTTAAT.....GC...ATGTA.GTAC.....
Ca      1 CTTATGGTGTCTGAGGA.....ATGTATGTCAGT.....GT...GTACA.GCATTACACTGAACGTTCTTTT
Cc      1 CTGAGAA.....ATATATGTCAGT.....GT...GTATA.GCATTACACTGAATGCTCTTTT
Pc      1 .TTTGAGAA.....ATATATGTCAGC.....GT...GTATG.GCATTACACTGAATGCTCTTTT
Cm      1 CTGCGTATATTGTCCCATGTCTGACCAAGCTAAAAATACATATCACTTTGTGCATAGC...ATATACATAT...AAAATCTGTATT
Ip      1 GCATGTGCGCGCGCGC.....ACACACACACAC.....AC...ACACACACAC.....
Ol      1 .CCTGCAGGCGG.....AGAGAGAAAAGC.....GC.....

Dr      40 ..A...CCAACGTGGCATTGTT.....TAATAACA...ACACTTCAGTGGATTGAACTA.TACCCTGGAGTTCAAAAACAACTCC
Dn      40 ..A...CCAACGTGGCCTTTGTT.....TAATAACA.....CTTCGGTGGGTTGAACTA.TACCCTGGAGTTCAAAAACAACTCC
Dalb    40 ..A...CCAACATGGCATTGTT.....TAATAACA...ACACTTCAGTGCATTGAACTA.TACCCTGAAGTTCAAAAACAACTCC
Dc      52 ..A...CCAATGTTGCATTGTT.....TAATAACA...ACACTTCATGTGATTGAACTA.TACCCTGGTGTCAAAAACAACTCC
Df      49 ..AATGCCAATGTGGCATTGTTTACACTTCATAACAACA...ACACTTCAGTGGATTGAACTA.TACCCTAGAGTTCAAAAACAACTCC
Daeq    47 ..A...CCAATCCGGCATTGTT.....TAATAACA...ACACATCAGTTGATTGAACTA.TACCCTGGAGATCAAAAACAACTCC
Ca      59 AGA...CCAATATGACGTTGTT.....TAATAACA...ACACGTGAGATGATTGACTATTCCCTGGCATTCAAAAACAACTCC
Cc      49 GGA...CCAGTGTGAGATTGTT.....TAATAACA...ACTCATCAGATGACTGGACTATTGCCCTGGAGTTCAAAAACAACTCC
Pc      50 GCA...CCAGTGTGAGATTGTT.....TAATAACA...ACATGGCAGATGACTGGACTATTGGCCCTGAGTTCAAAAACAACTCC
Cm      82 GAA...CAAATATGGTATT.....TAAGGACA...ACATGTCAAAGATTGACTATTGCCCTGGAATTCAAAAACAAAG...
Ip      41 ..A...CACACACA.....CACACACACACACACACACACAGATTTTAAATTTGTCCAGTTAACCTAAATAAAAAATCTC
Ol      26 ..A.....GGTTTCCTTG.....TAAAAAAA.....GCTTCTCCGAGTC...CTGCGGCCCTCGATCTTCA.....TC
          *                *                *                *                *

Dr      113 ATGCTGGC.....TTCTGGGTCTCTGGG.TGACATGTTCAAGTCCAGTGTGTTGAGATAAGGATTT..AGTACACCATTAACAATA
Dn      110 ATGCTGGC.....TTCTGGGTCTCTGGG.TGACATGTTCAAGTCCAGTGTGTTGAGATAAGGATTT..AGTACACCATTAACAATG
Dalb    113 ATGCTGGC.....TTCTGGGTCTCTGGG.TGACATGTTCAAGTCCAGTGTGTTGAGATAAGGATTTTANGTACACCATTAACAATG
Dc      125 ATGCTGGC.....TTCTGGGTCTCTGGG.TGACATGTTCAAGTCCAGTGTGTTGAGATAAGGATTT..AGTACACCATTAACAATG
Df      133 ATGCTGGC.....TTCTGGGTCTCTGGG.TGACATGTTCAAGTCCAGTGTGTTGAGATAAGGATTT..AGTACACCATTAACAATG
Daeq    120 ATGCTGGC.....TTCTGGGTCTCTGGG.TGACACGTTCAAGTCCCGTGTGTTGAGATAAGGCTTT..AGTTCACCATTAACAATG
Ca      135 ATGCTGAC.....TTTGGATTCTCTGGG.TGACACGTAAAGATTCTGTCTTTGAGATAAGGATTT..AGTTCACCATTAAGCAATG
Cc      125 ATGTTGGC.....TTCTGGGTCTCTGGG.TGGCAGTTCAGGTTCTGTGTTGAGATAAAGGATTT..AGTTCACCATTAACAATG
Pc      126 ATGTTGGC.....TTTGGGTCTCTGGGTTGGCAGTTCAGGTTCTGCAGTTGAGATAAAGGATTT..AGTTCACCATGT.....
Cm      150 AAGTTGGT.....TTCTGGGTACT.....TCAAGTTCGTGACTGCGATAAGGATTT..AGTTTGTCTATTAACAATG
Ip      109 ACACT.....ATGAGAAGTTTCCAGTCT.....GTGCTG.....ATATAAG.....CGTACACACACACACACA.
Ol      78 ACTTTGGCAGAACATTTTCAGGTTTCAGACTGATAT...AAAACCCAGCGG.....GTCACACGCTG

Dr      192 A.GATAAACACCTTATCCTGGACGTGTGAGCGTTTTAAATACT.TTGGCAACTTAAACATCTTTGTTGGGTAC..AGCCTTGGGCAAAGG
Dn      189 A.GATAAACCATTTAT.....TTGCCAACTTTAAATCTCTGTTGGGTAC..AGGTTTGGGCAAAGG
Dalb    194 A.GATAAACCTTTATCCTGGACGTGTGAGCGATTTCCATTCT.TTACCAACTTTAAATGTCTGTTGGGTAC..AGGCTTGGGCAAAGG
Dc      204 A.GATAAACGCTTATCCTGAACGTGTGAGCGATTTCCATTCT.TTGCCAACTTTAAATCTCTGTTGGGTAC..AGGCTTGGGCAAAGG
Df      212 A.GATAAAGCTTATCCTGGACGTGTGAGCGTTTTCCATTTT.TTGCCAACTTTAAATCTCTGTTGGGTAC..AGGCTTGGGCAAAGG
Daeq    199 .....CCAACCTTTAAATCTCTGTTGGGTAC..AAGCTTGGGCAAAGG
Ca      213 GAGATAAACACCTTGTCTGAAATGTGTGAGCAATTTCCATTTA.GTGCCAACTTTAAACATCCCTGTTGGGTAC..AGGCTTGGGCAAAGG
Cc      203 T.GATAAACCTTTACCTAGACATGTGAACAATTTCCATTTA.GTGCCAACTTTATAAATCCCTGTTGGGTAC..AGGCTTGGGTAAGG
Pc      198 ..GATAAACTTTACCTAGACGTGCTAGCGGTTTCCATTTTACTGCCAACTTTGGCAT...GTTTGTATAC..AGGCTTGGTAAAGG
Cm      217 A.GATGAACAC.....ATGAGAAGTTTCCAGTCT.GTGCCAACTATGGAATCCCTATTAGAATACTTATGACTG...ACAAG
Ip      151 ..CACACACACCTATCT.....GTGCTG.....AAATG
Ol      139 GAGTCAAACCCAA.....TTCCCAAGGTTAACTT.....GGGATTGAGGGGATC

Dr      278 TCATTTCAGATGCTTGAACA.....TGTGTTG...TGTCTTCAG
Dn      248 TCATTTCAGAAATGCTTGAACA.....TGTGTTG...TGTCTTCAG
Dalb    280 TCACTTCAGATGCTTGAACA.....TGCCTTG...TGTCTTCAG
Dc      290 TCATTTCAGATGCTTGAACG.....TGTGTTG...TGTCTTCAG
Df      298 TCATTTCAGATGCTTGAACA.....TGTGTTG...TGTCTTCAG
Daeq    241 TCATTTCAGATGCTTGAACA.....TGTGTTG...TGTCTTCAG
Ca      300 TAATTTCAGATGTGTTGAACA..TTTGTGGTGTGTTG...TATCTTCAG
Cc      289 TCATTTCAGACATGTGAACATTTTGTGGTGTGTTG...TGTCTTCAG
Pc      280 TCATTTCAGACGTGTGAACATTTTGTGGTGTGTTG...TGTCTTCAG
Cm      289 TGACATGTAGATATGTTAAACA.TGTATGTTTGTGTTT...TGTCTTCAG
Ip      177 TTATGT.....TAAACG.....TGTGTTTAAATGTTATTTGCA.
Ol      184 CAGACAGCAGCAGCGTGTACT.....CATCCGCCCTAAAATGCTTTCAG

```
